# Supplementary material
Source: MDPI journal article supplement (https://www.mdpi.com/search?q=catalysts-08-00249)

# Supplementary Materials: Enzymatic Synthesis of Thioesters from Thiols and Vinyl Esters in a Continuous-Flow Microreactor

Nani Zhou <sup>1</sup>, Le Shen <sup>1</sup>, Zhen Dong <sup>1</sup>, Jiahong Shen <sup>1</sup>, Lihua Du <sup>1,\*</sup> and Xiping Luo <sup>2,\*</sup>

## 3. Materials and Methods

### 3.2. Thioester Synthesis Operating Conditions

#### 3.2.1. General Procedure for Thioesters Synthesis under Shaker Conditions

**Method A:** Benzyl mercaptan (1 mmol) and vinyl laurate (3 mmol) were added to 5 mL DMSO. The biocatalyst lipozyme TL IM (0.22 g, 44 mg mL<sup>-1</sup>) was then added and the suspension maintained at 50 °C for 24 h under Shaker Conditions. The mixture was cooled and filtered. Then evaporated under reduced pressure and the residue was submitted to column chromatography on silica gel (200-300 mesh). The products were eluted with a gradient of normal petroleum ether: ethyl acetate (20: 1, by vol). The purification was monitored by TLC. The fractions containing the main products were pooled, the solvent evaporated, and the residue analyzed by <sup>1</sup>H NMR, <sup>13</sup>C NMR and ESI-MS.

#### 3.2.2. General Procedure for Thioester Synthesis in Continuous Flow Microreactors

**Method B:** 4 mmol of the benzyl mercaptan was dissolved in 10 mL DMSO (feed 1) and 8 mmol vinyl laurate were dissolved in 10 mL DMSO (feed 2). Lipozyme TL IM (0.87 g, 44 mg mL<sup>-1</sup>) was weighed, then filled the MVQ reactor coil (inner diameter ID: 2.0 mm, length: 1 m). Feeds 1 and 2 were mixed together at a flow rate of 10.4 μL min<sup>-1</sup> in a Y-mixer at 50 °C and the resulting stream (20.8 μL min<sup>-1</sup>) was connected to a sample vial which was used to collect the final mixture. The final mixture was then evaporated, and the residue was submitted to column chromatography on silica gel (200-300 mesh). The products were eluted with a gradient of normal petroleum ether: ethyl acetate (20: 1, by vol). The purification was monitored by TLC. The fractions containing the main products were pooled, the solvent evaporated, and the residue analyzed by <sup>1</sup>H NMR, <sup>13</sup>C NMR and ESI-MS.

In order to examine the reproducibility of the method, we repeated the reaction five times, the result are illustrate in Figure S1.

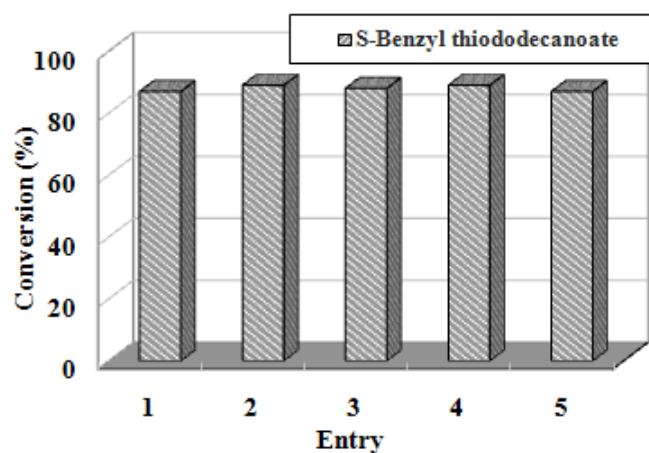

**Figure S1.** The reproducibility of the reaction on the conversion of S-Benzyl thiododecanoate catalysed by Lipozyme TL IM in a continuous flow microreactor.

## Nuclear magnetic resonance (NMR) analysis

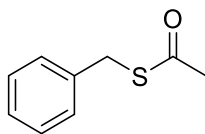

**S-benzyl thioacetate (3a):** Light yellow oil;  $^1\text{H}$  NMR (500 MHz,  $\text{CDCl}_3$ ):  $\delta$  7.32 - 7.26 (m, 5H), 4.15 (s, 2H), 2.37 (s, 3H).  $^{13}\text{C}$  NMR (125 MHz,  $\text{CDCl}_3$ ):  $\delta$  195.0, 137.6, 128.8, 128.6, 127.2, 33.4, 30.2. ESI-MS:  $m/z = 189.1$   $[\text{M}+\text{Na}]^+$ .

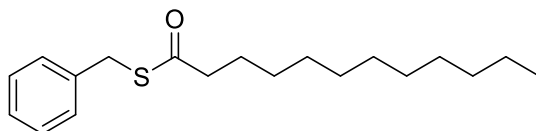

**S-benzyl thiododecanoate (3b):** White crystals;  $^1\text{H}$  NMR (500 MHz,  $\text{CDCl}_3$ ):  $\delta$  7.36 - 7.27 (m, 5H), 4.17 (s, 2H), 2.61 (t,  $J = 7.5$  Hz, 2H), 1.73 (m, 2H), 1.35 (m, 16H), 0.98 (t,  $J = 6.0$  Hz, 3H).  $^{13}\text{C}$  NMR (125 MHz,  $\text{CDCl}_3$ ):  $\delta$  198.2, 137.7, 128.6, 128.4, 127.0, 43.6, 32.9, 31.8, 29.5, 29.4 - 29.1, 28.8, 25.5, 22.6, 14.0. ESI-MS:  $m/z = 329.2$   $[\text{M}+\text{Na}]^+$ .

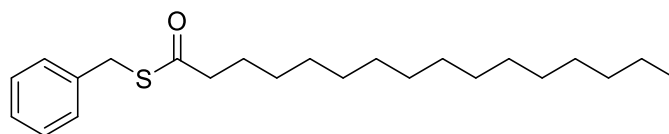

**S-benzyl thiohexadecanoate (3c):** White solid;  $^1\text{H}$  NMR (500 MHz,  $\text{CDCl}_3$ ):  $\delta$  7.34 - 7.25 (m, 5H), 4.14 (s, 2H), 2.58 (t,  $J = 7.5$  Hz, 2H), 1.66 (m, 2H), 1.47 - 1.23 (m, 24H), 0.91 (t,  $J = 7.0$  Hz, 3H).  $^{13}\text{C}$  NMR (125 MHz,  $\text{CDCl}_3$ ):  $\delta$  198.9, 137.8, 129.3, 129.0, 128.8, 128.6, 127.2, 43.9, 33.1, 31.9, 29.7, 29.6 - 29.1, 29.0, 25.6, 22.7, 14.1. ESI-MS:  $m/z = 385.2$   $[\text{M}+\text{Na}]^+$ .

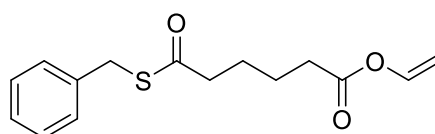

**6-oxo-6-((benzylthio)-hexanoate vinyl ester (3d):** Yellow oil;  $^1\text{H}$  NMR (500 MHz,  $\text{CDCl}_3$ ):  $\delta$  7.35 - 7.24 (m, 6H), 4.89 (ddd,  $J = 14.0, 3.4, 1.6$  Hz, 1H), 4.59 (ddd,  $J = 6.3, 2.4, 1.7$  Hz, 1H), 4.14 (s, 2H), 2.59 (m, 2H), 2.43 (m, 2H), 1.72 (m, 4H).  $^{13}\text{C}$  NMR (125 MHz,  $\text{CDCl}_3$ ):  $\delta$  198.1, 170.1, 141.1, 137.5, 128.7, 128.6, 127.2, 97.6, 43.2, 33.4, 33.1, 24.7, 23.8. ESI-MS:  $m/z = 301.1$   $[\text{M}+\text{Na}]^+$ .

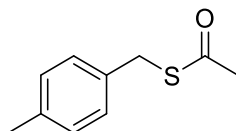

**S-(4-methylbenzyl) ethanethioate (3e):** Light yellow oil;  $^1\text{H}$  NMR (500 MHz,  $\text{CDCl}_3$ ):  $\delta$  7.19 (d,  $J = 7.6$  Hz, 2H), 7.12 (d,  $J = 7.6$  Hz, 2H), 4.10 (s, 2H), 2.35 (s, 3H), 2.33 (s, 3H).  $^{13}\text{C}$  NMR (125 MHz,  $\text{CDCl}_3$ ):  $\delta$  195.0, 137.9, 134.2, 129.8, 129.7, 33.4, 30.2, 21.1. ESI-MS:  $m/z = 203.1$   $[\text{M}+\text{Na}]^+$ .

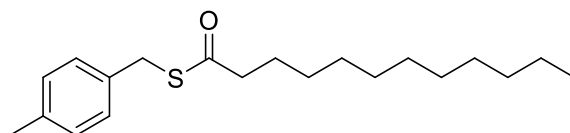

**S-(4-methylbenzyl) thiododecanoate (3f):** Yellow liquid oil;  $^1\text{H NMR}$  (500 MHz,  $\text{CDCl}_3$ ):  $\delta$  7.18 (d,  $J = 7.6$  Hz, 2H), 7.12 (d,  $J = 7.6$  Hz, 2H), 4.10 (s, 2H), 2.57 (t,  $J = 7.5$  Hz, 2H), 2.33 (s, 3H), 1.64 (m, 2H), 1.31 (m, 16H), 0.89 (t,  $J = 7.1$  Hz, 3H).  $^{13}\text{C NMR}$  (125 MHz,  $\text{CDCl}_3$ ):  $\delta$  199.1, 137.0, 134.7, 129.4, 128.8, 43.9, 32.9, 32.0, 29.7, 29.6 - 29.3, 29.0, 25.7, 22.8, 21.1, 14.2. ESI-MS:  $m/z = 343.2$   $[\text{M}+\text{Na}]^+$ .

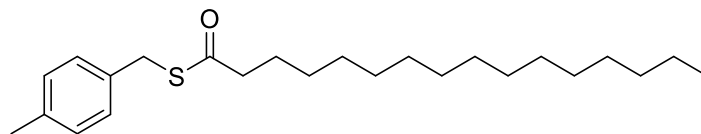

**S-(4-methylbenzyl) thiohexadecanoate (3g):** Light yellow oil;  $^1\text{H NMR}$  (500 MHz,  $\text{CDCl}_3$ ):  $\delta$  7.19 (d,  $J = 8.0$  Hz, 2H), 7.12 (d,  $J = 7.9$  Hz, 2H), 4.10 (s, 2H), 2.56 (t,  $J = 7.5$  Hz, 2H), 2.34 (s, 3H), 1.68 (m, 2H), 1.32 - 1.27 (m, 24H), 0.90 (t,  $J = 7.0$  Hz, 3H).  $^{13}\text{C NMR}$  (125 MHz,  $\text{CDCl}_3$ ):  $\delta$  199.0, 136.9, 134.7, 129.3, 128.7, 43.9, 32.9, 32.0, 29.7, 29.6 - 29.3, 29.0, 25.6, 22.7, 21.1, 14.1. ESI-MS:  $m/z = 399.3$   $[\text{M}+\text{Na}]^+$ .

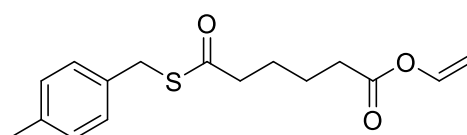

**6-oxo-6-((4-methylbenzyl)thio)-hexanoate vinyl ester (3h):** Light yellow oil;  $^1\text{H NMR}$  (500 MHz,  $\text{CDCl}_3$ ):  $\delta$  7.31 - 7.20 (m, 5H), 4.87 (ddd,  $J = 14.0, 3.3, 1.7$  Hz, 1H), 4.56 (ddd,  $J = 6.2, 2.0, 1.7$  Hz, 1H), 4.11 (s, 2H), 2.59 (m, 2H), 2.41 (m, 2H), 2.39 (s, 3H), 1.71 (m, 4H).  $^{13}\text{C NMR}$  (125 MHz,  $\text{CDCl}_3$ ):  $\delta$  198.0, 170.1, 141.0, 137.5, 128.7, 128.5, 127.2, 97.6, 43.1, 33.4, 33.1, 24.7, 23.8, 23.7. ESI-MS:  $m/z = 315.1$   $[\text{M}+\text{Na}]^+$ .

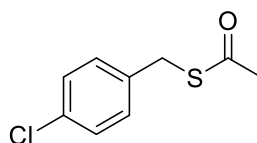

**S-(4-chlorobenzyl) ethanethioate (3i):** Light yellow oil;  $^1\text{H NMR}$  (500 MHz,  $\text{CDCl}_3$ ):  $\delta$  7.27 (dd,  $J = 8.6, 6.6$  Hz, 2H), 7.23 (dd,  $J = 8.5, 6.1$  Hz, 2H), 4.08 (s, 2H), 2.36 (s, 3H).  $^{13}\text{C NMR}$  (125 MHz,  $\text{CDCl}_3$ ):  $\delta$  195.0, 135.7, 132.7, 130.8, 128.8, 33.1, 30.5. ESI-MS:  $m/z = 223.0$   $[\text{M}+\text{Na}]^+$ .

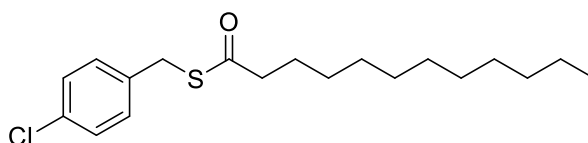

**S-(4-chlorobenzyl) thiododecanoate (3j):** Yellow liquid oil;  $^1\text{H NMR}$  (500 MHz,  $\text{CDCl}_3$ ):  $\delta$  7.27 (dd,  $J = 8.5, 6.5$  Hz, 2H), 7.23 (dd,  $J = 8.5, 6.0$  Hz, 2H), 4.08 (s, 2H), 2.57 (t,  $J = 7.2$  Hz, 2H), 1.66 (m, 2H), 1.29 (m, 16H), 0.90 (t,  $J = 6.0$  Hz, 3H).  $^{13}\text{C NMR}$  (125 MHz,  $\text{CDCl}_3$ ):  $\delta$  198.7, 141.2, 136.5, 133.0, 130.2, 128.7, 43.8, 34.0, 32.4, 31.9, 29.6 - 29.0, 28.9, 25.6, 24.6, 22.7, 14.1. ESI-MS:  $m/z = 363.2$   $[\text{M}+\text{Na}]^+$ .

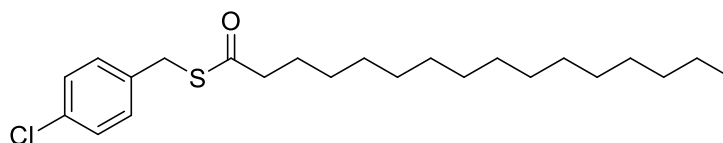

**S-(4-chlorobenzyl) thiohexadecanoate (3k):** Yellow oil;  $^1\text{H NMR}$  (500 MHz,  $\text{CDCl}_3$ ):  $\delta$  7.27 (dd,  $J = 8.4, 6.3$  Hz, 2H), 7.23 (dd,  $J = 8.3, 6.0$  Hz, 2H), 4.23 (s, 2H), 2.58 (t,  $J = 7.5$  Hz, 2H), 1.78 (d,  $J = 7.1$  Hz, 2H), 1.58 - 1.32 (m, 24H), 0.89 (t,  $J = 6.8$  Hz, 3H).  $^{13}\text{C NMR}$  (125 MHz,  $\text{CDCl}_3$ ):  $\delta$  199.0, 135.9, 132.8,

131.9, 131.7, 129.2, 128.8, 44.2, 33.6, 32.9, 30.1, 29.8 - 29.2, 28.0, 26.5, 23.4, 14.9. ESI-MS:  $m/z = 419.2$   $[M+Na]^+$ .

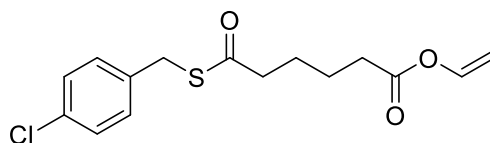

**6-oxo-6-((4-chlorobenzyl)thio)hexanoate vinyl ester(31):** Yellow oil;  $^1\text{H NMR}$  (500 MHz,  $\text{CDCl}_3$ ):  $\delta$  7.32 - 7.20 (m, 5H), 4.89 (ddd,  $J = 14.0, 3.4, 1.6$  Hz, 1H), 4.59 (ddd,  $J = 6.3, 2.4, 1.6$  Hz, 1H), 4.08 (s, 2H), 2.61 (m, 2H), 2.41 (m, 2H), 1.72 (m, 4H).  $^{13}\text{C NMR}$  (125 MHz,  $\text{CDCl}_3$ ):  $\delta$  198.0, 170.2, 141.1, 136.3, 133.1, 130.2, 128.8, 97.7, 43.2, 33.4, 32.5, 24.8, 23.8. ESI-MS:  $m/z = 335.1$   $[M+Na]^+$ .

### Copy of $^1\text{H NMR}$ and $^{13}\text{C}$ Spectra of Products

$^1\text{H-NMR}$  of compound **3a**

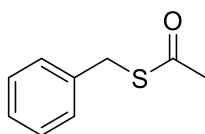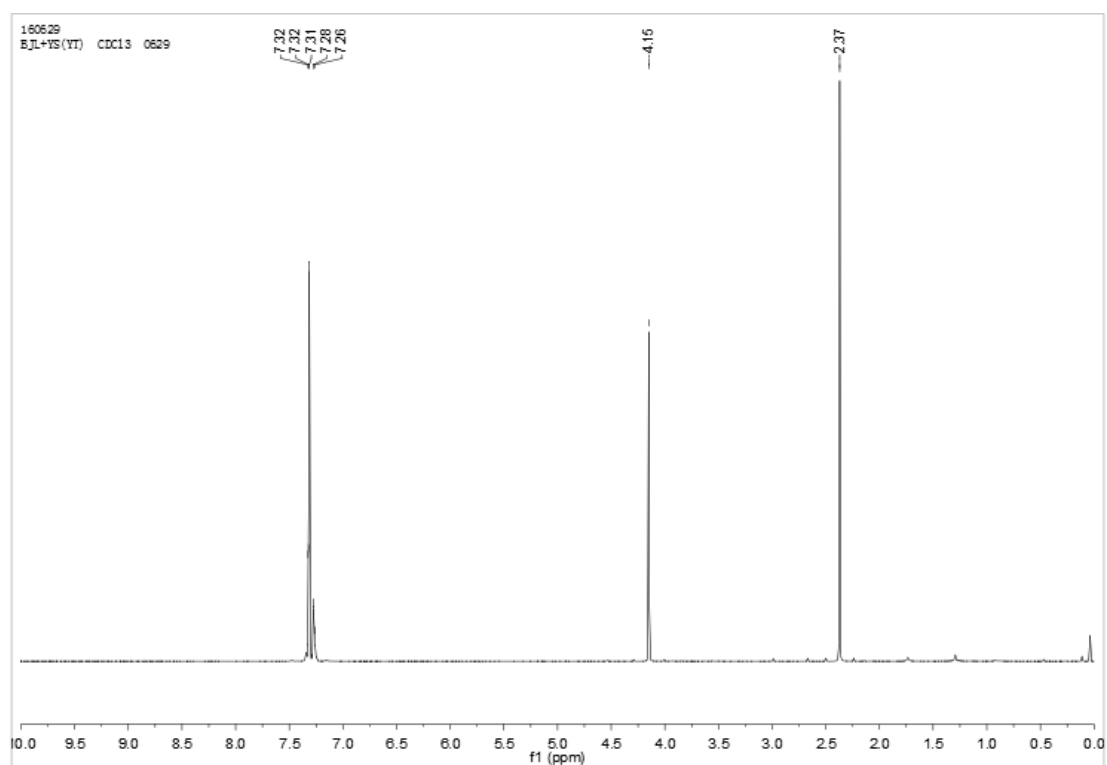

<sup>13</sup>C-NMR of compound **3a**

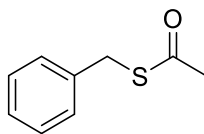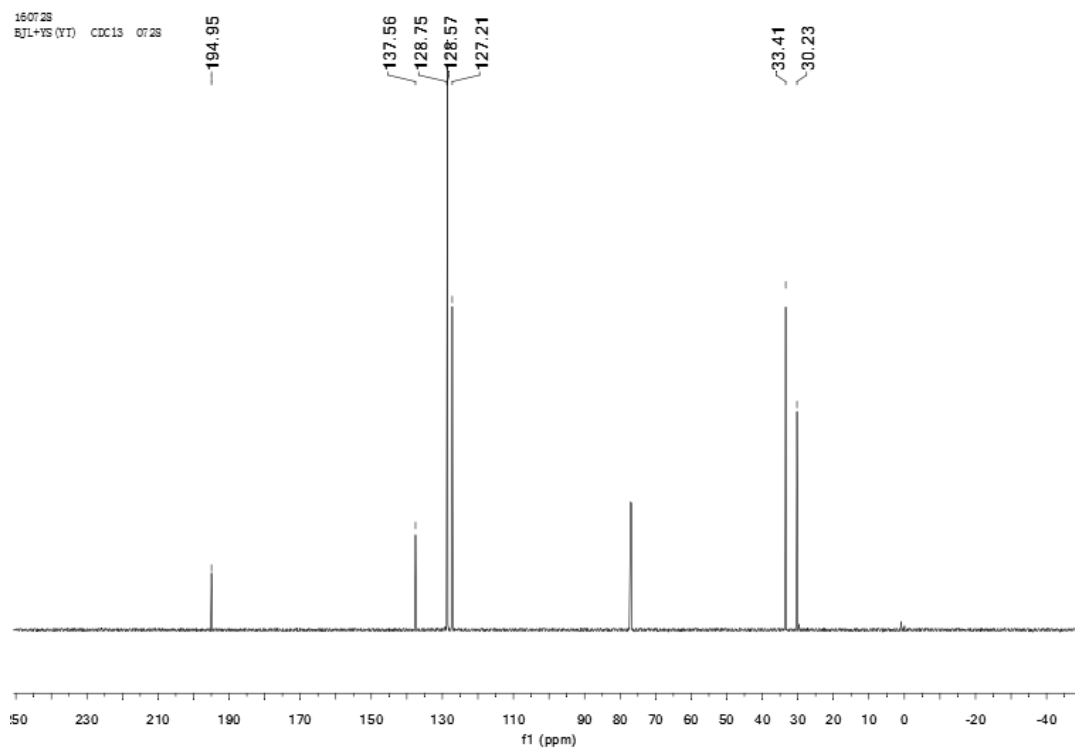

<sup>1</sup>H-NMR of compound **3b**

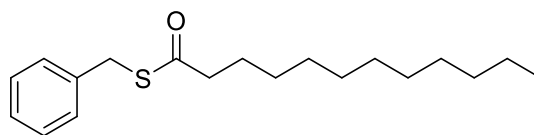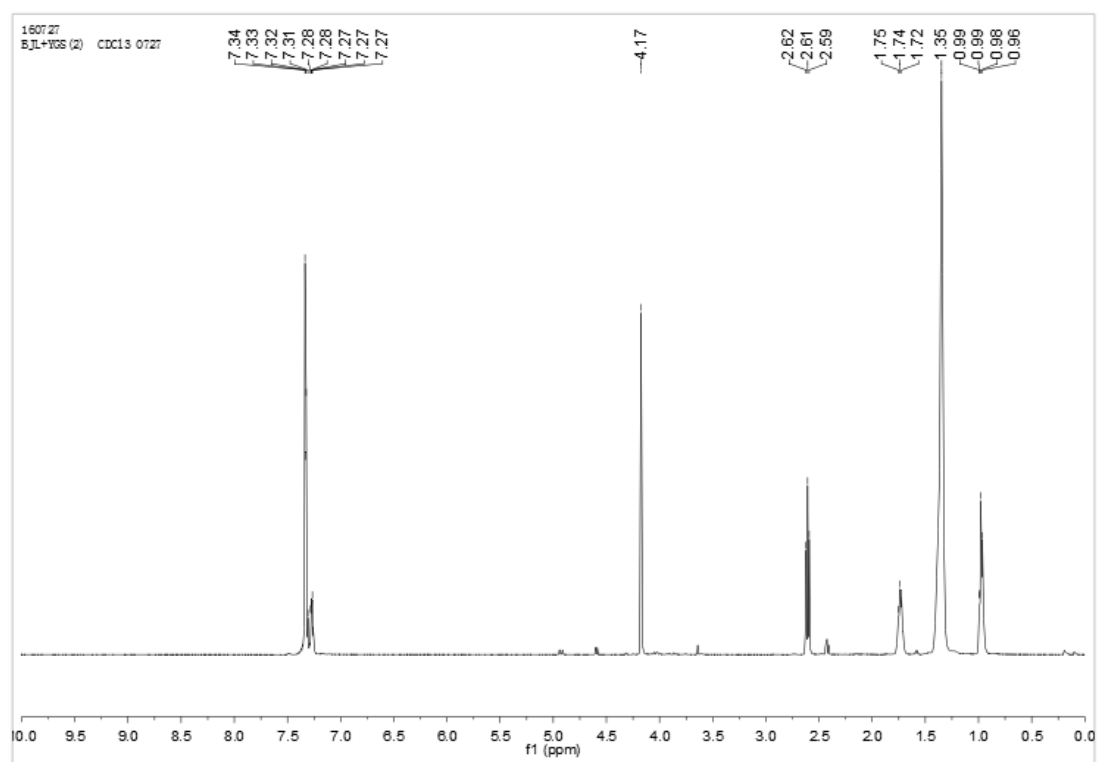

<sup>13</sup>C-NMR of compound **3b**

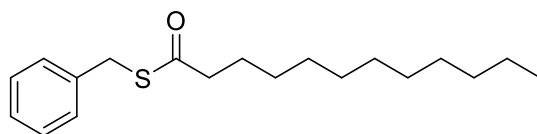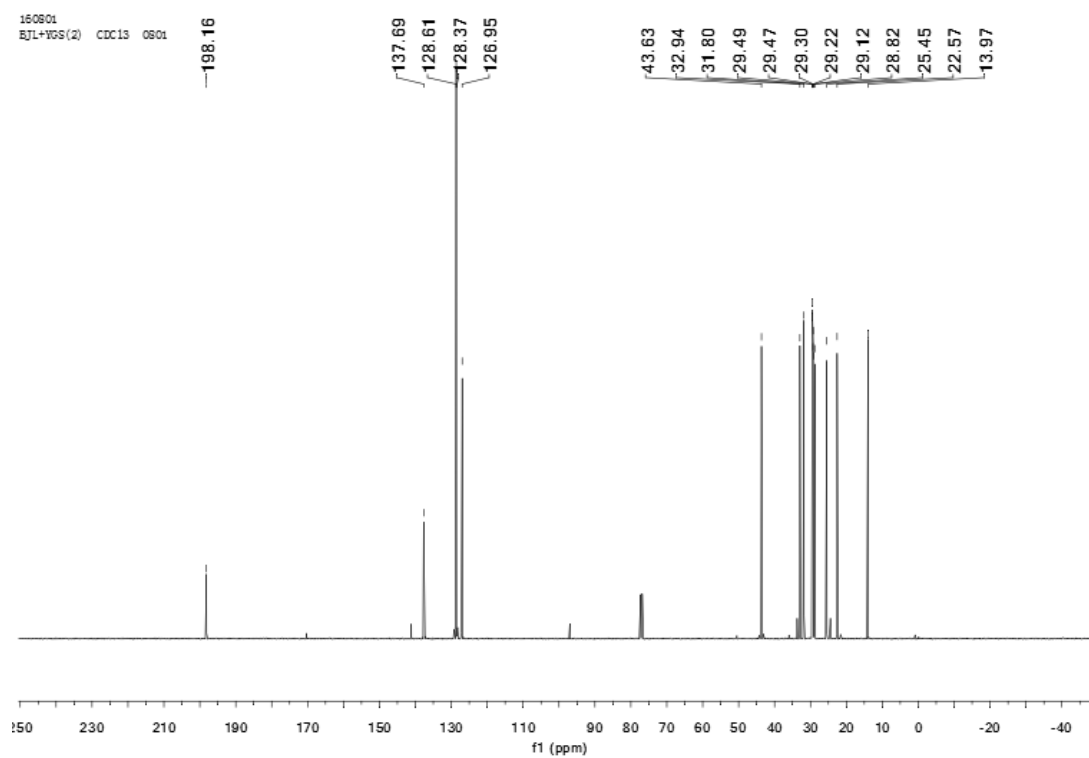

<sup>1</sup>H-NMR of compound 3c

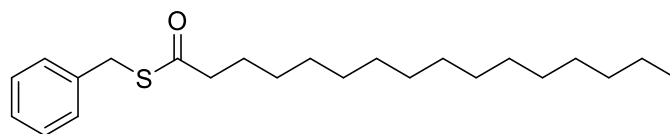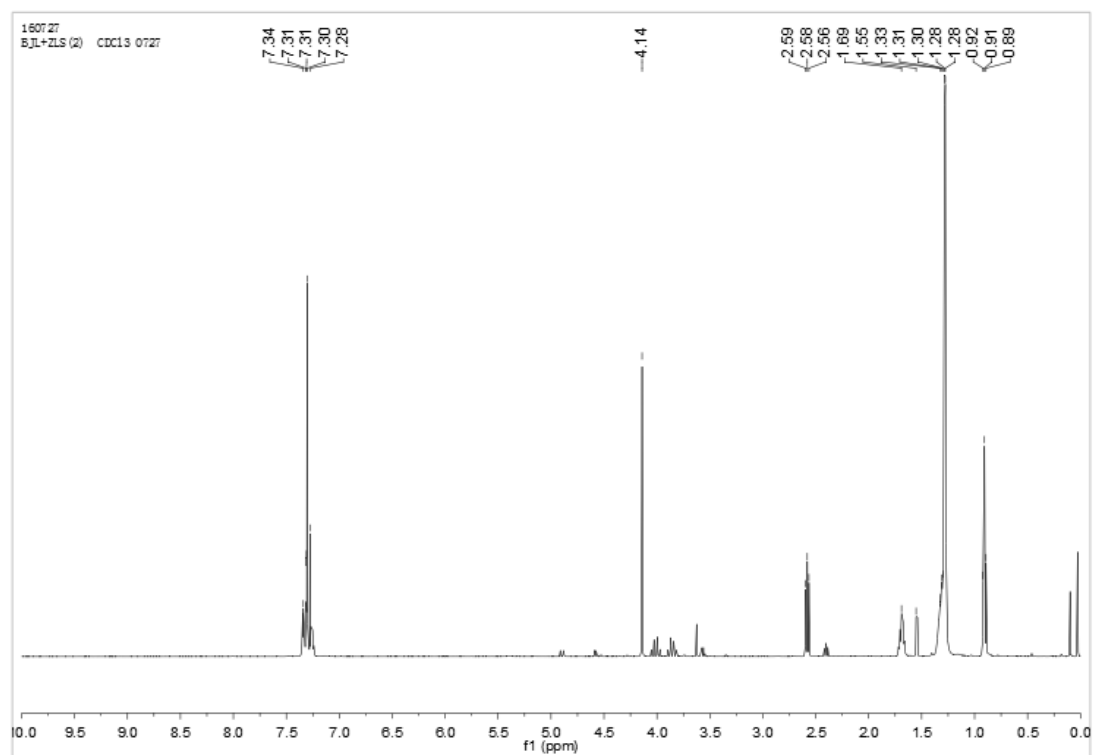



<sup>13</sup>C-NMR of compound 3c

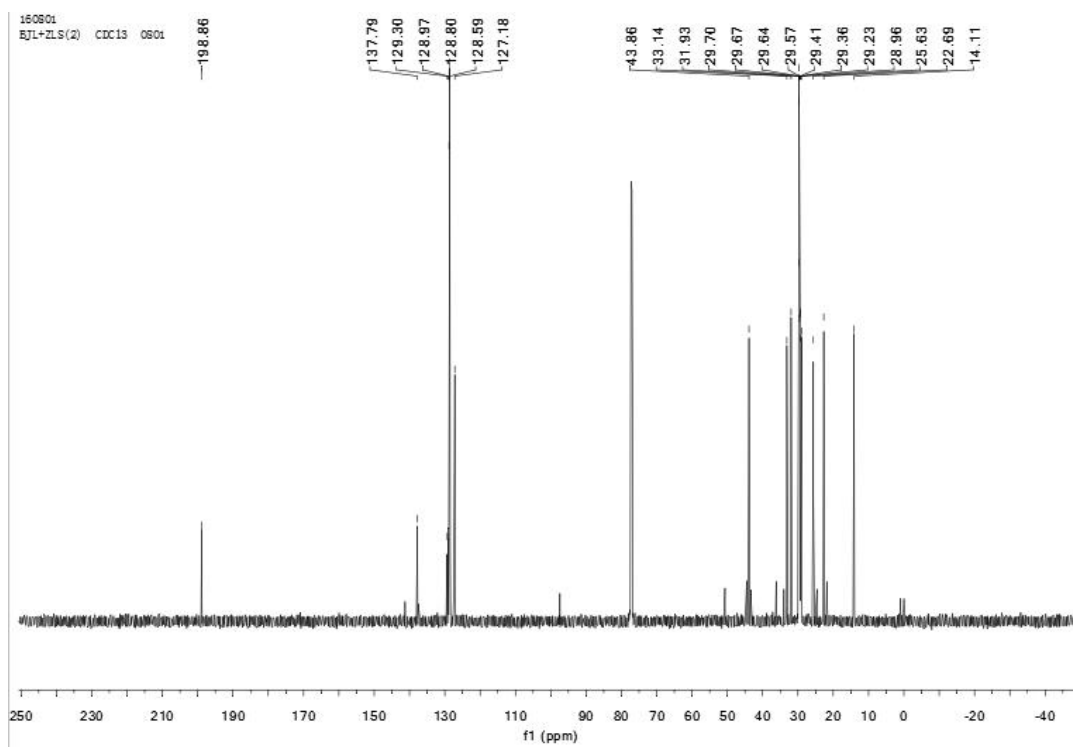

<sup>1</sup>H-NMR of compound 3d

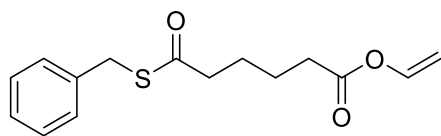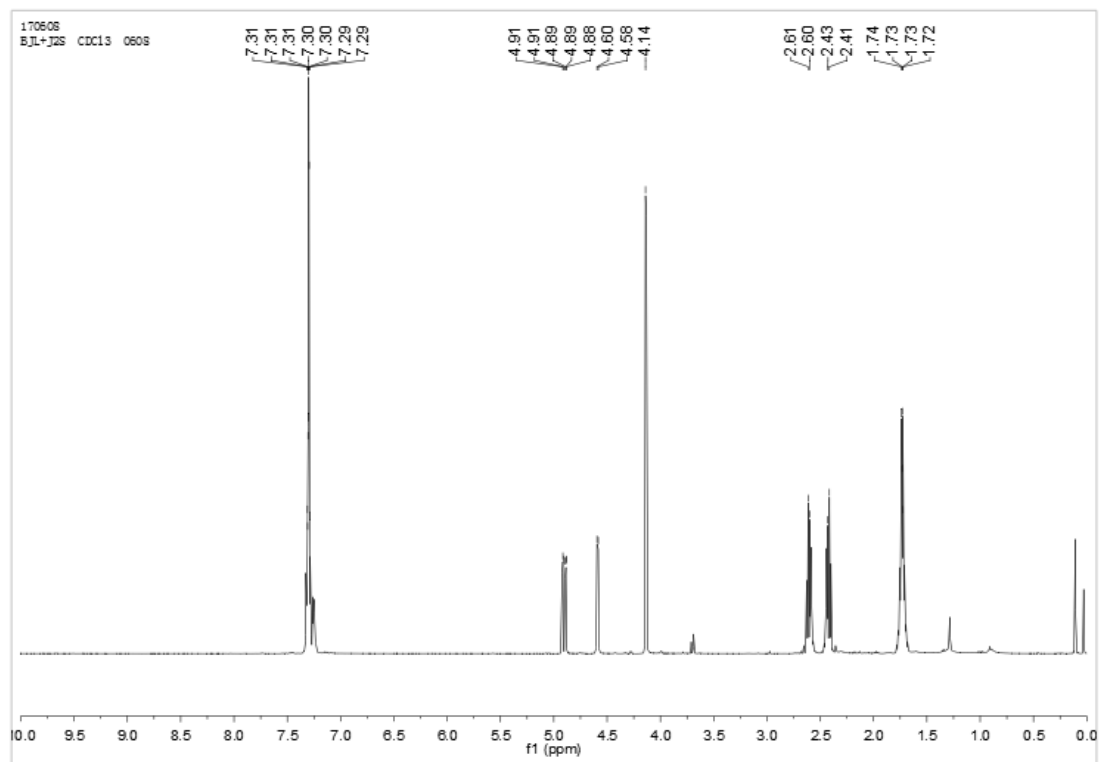

<sup>13</sup>C-NMR of compound **3d**

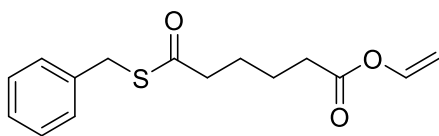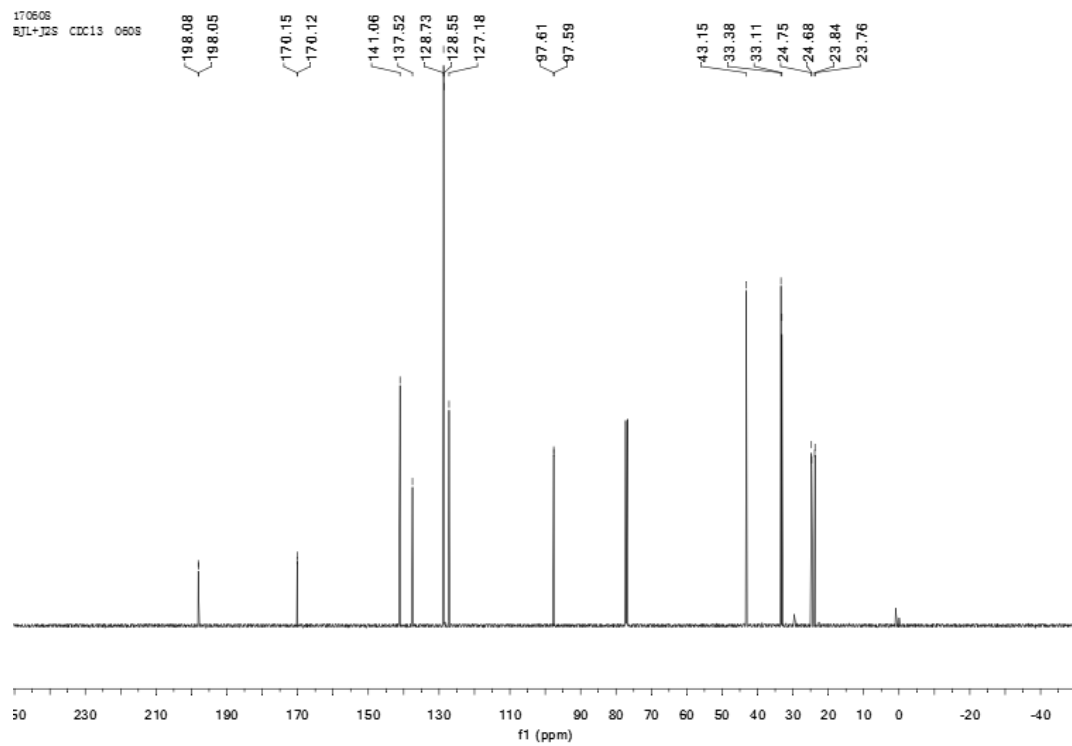

<sup>1</sup>H-NMR of compound 3f

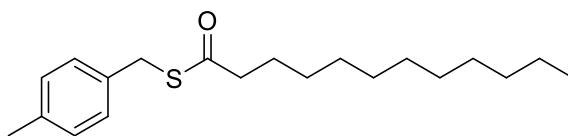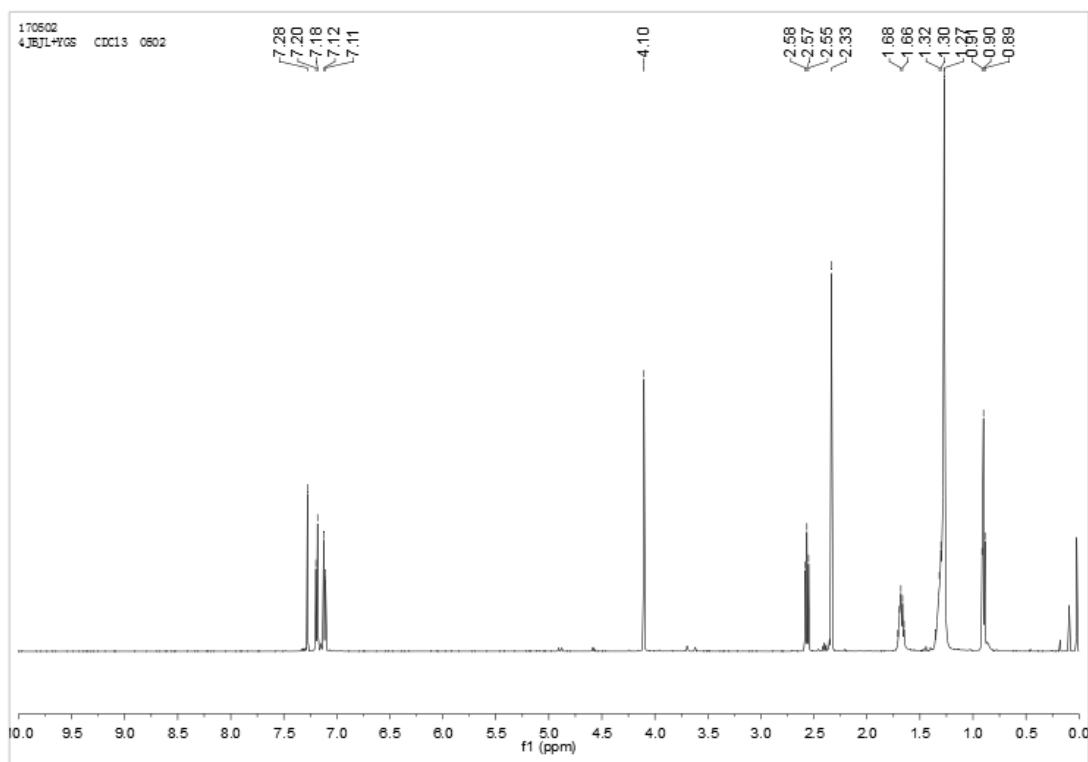

<sup>13</sup>C-NMR of compound 3f

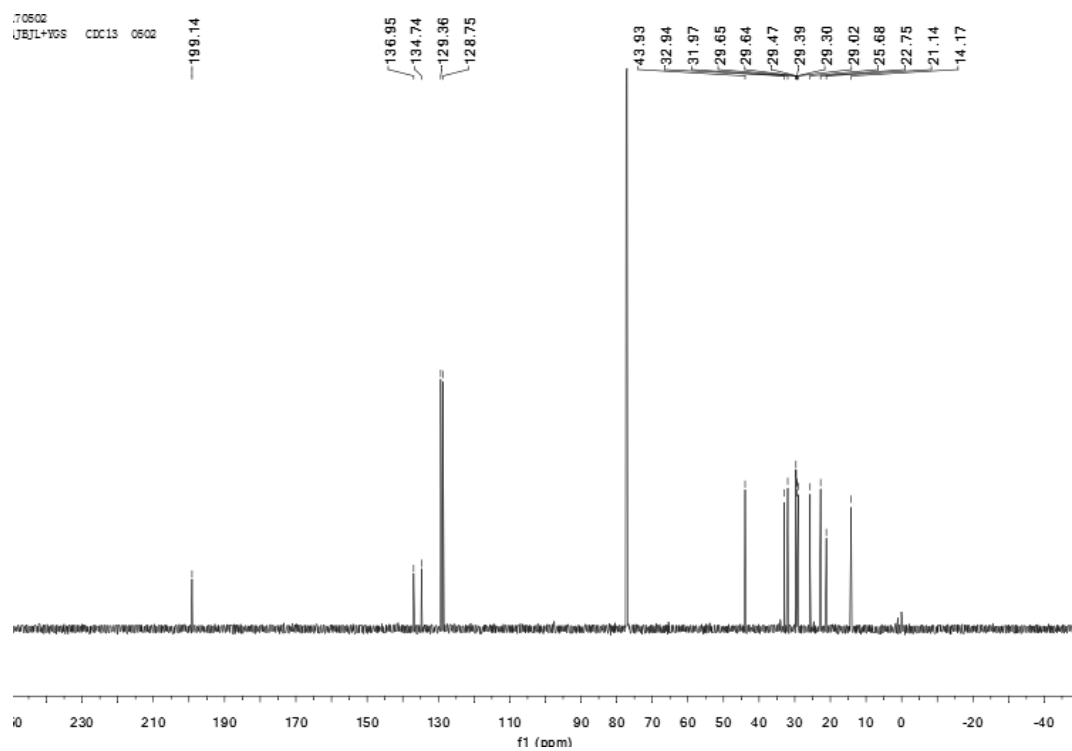

<sup>1</sup>H-NMR of compound **3g**

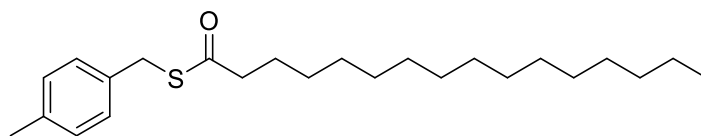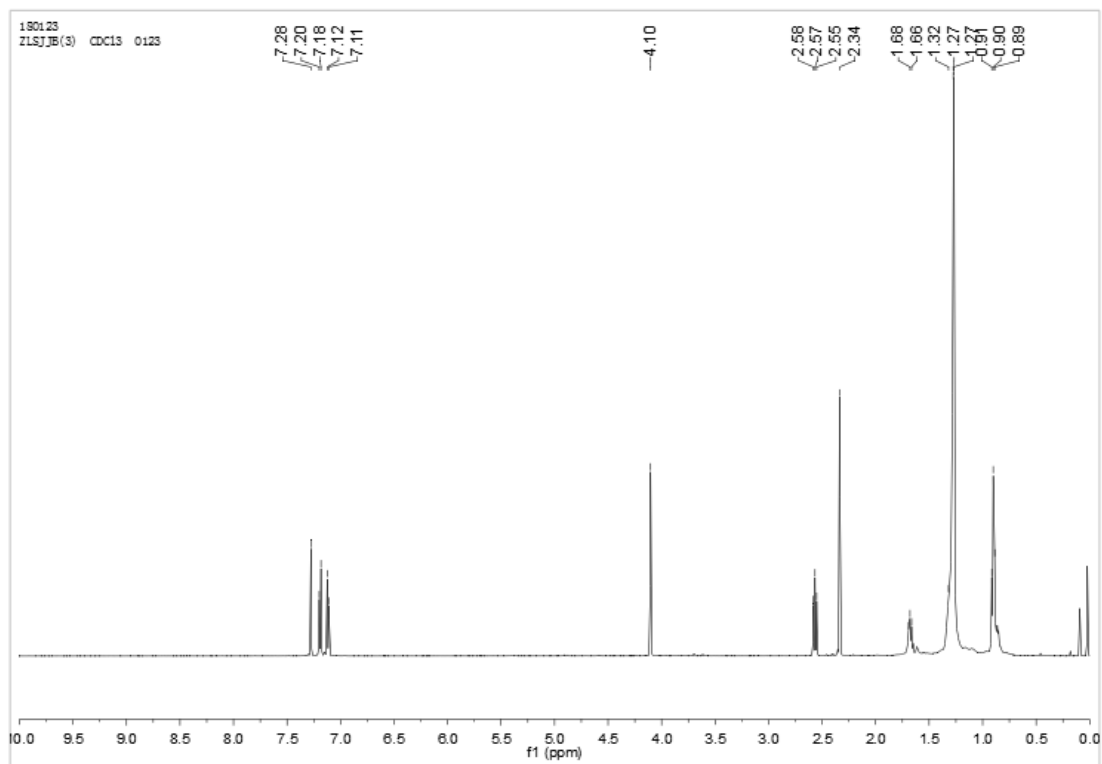

<sup>13</sup>C-NMR of compound 3g

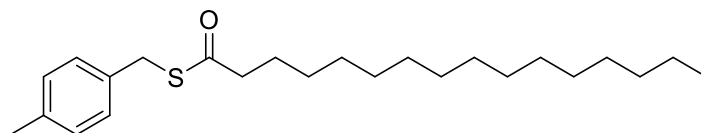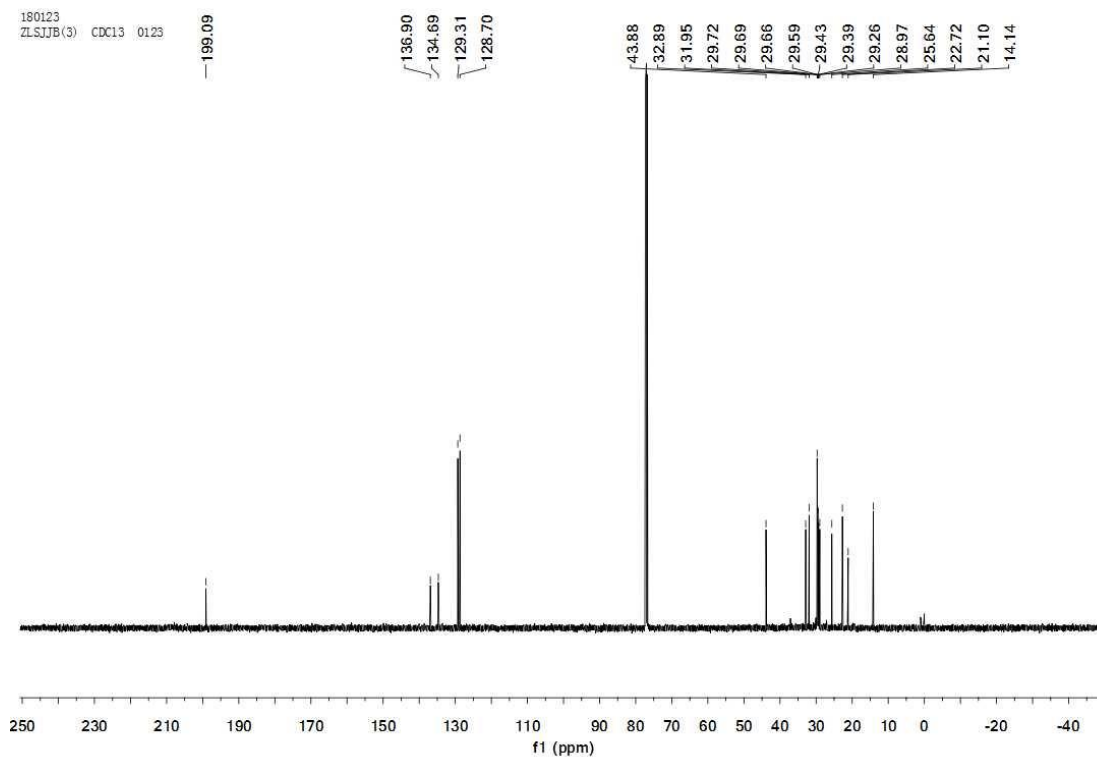

<sup>1</sup>H-NMR of compound **3h**

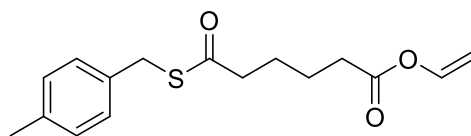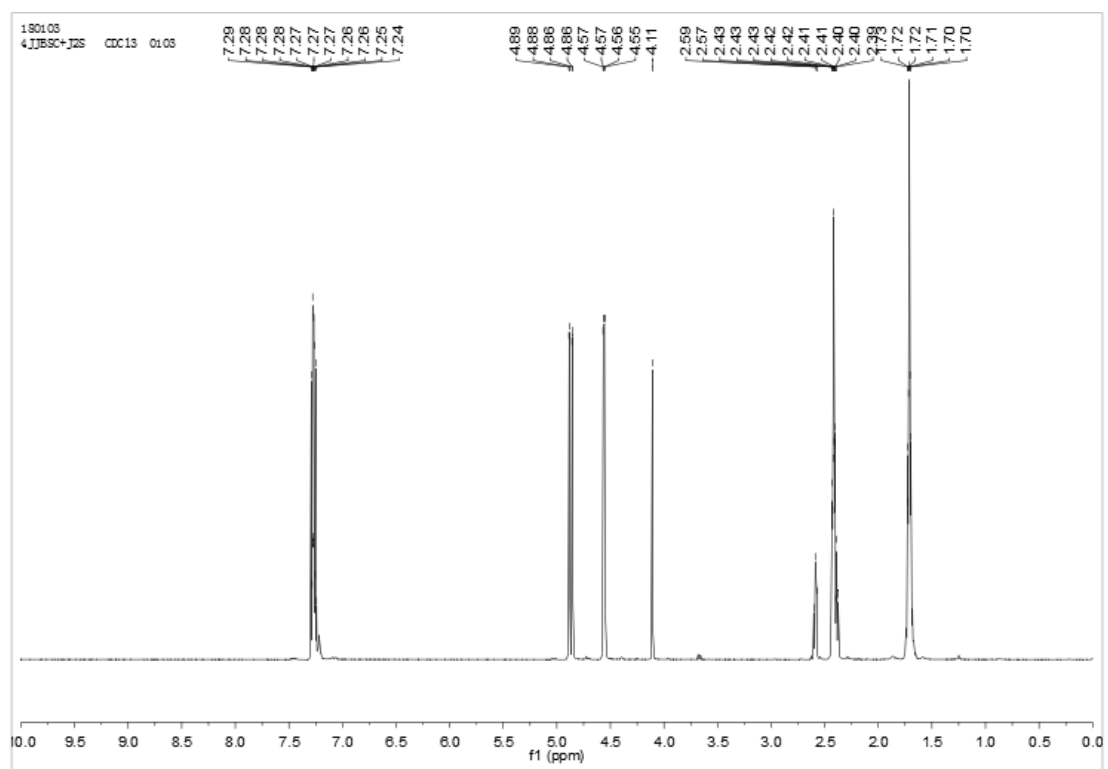



<sup>13</sup>C-NMR of compound **3h**

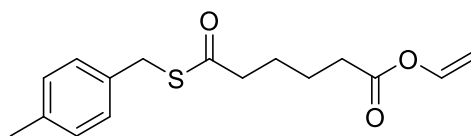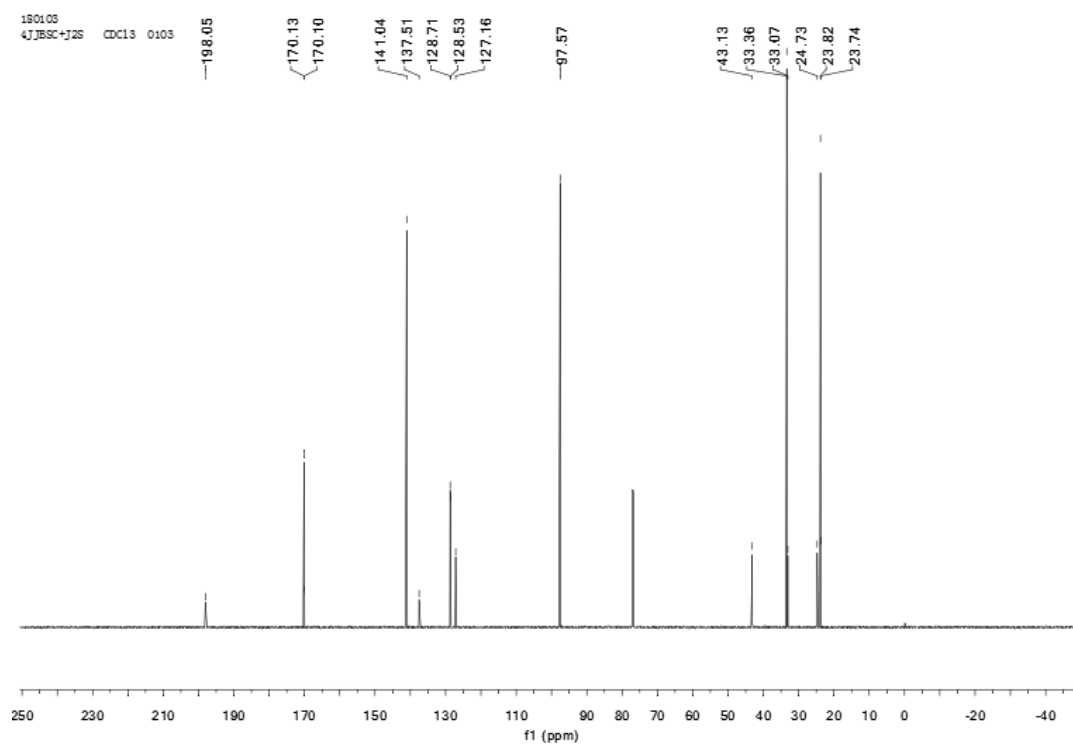

<sup>1</sup>H-NMR of compound 3j

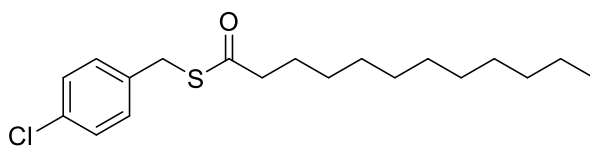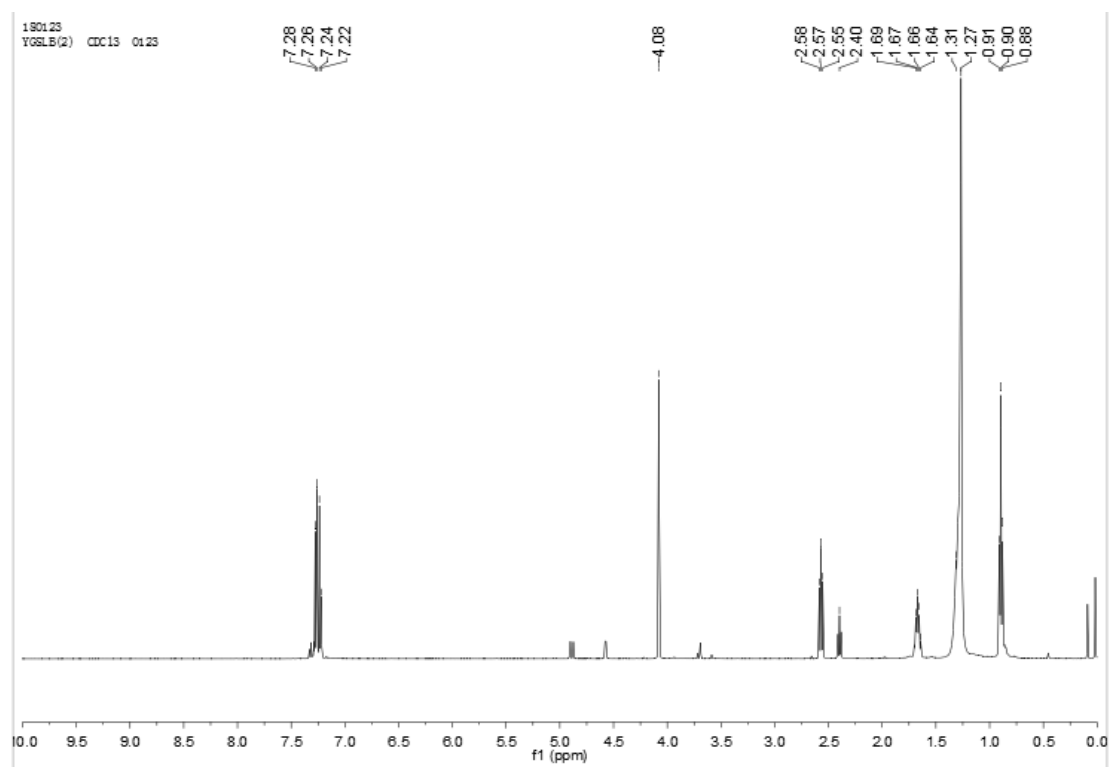

<sup>13</sup>C-NMR of compound 3j

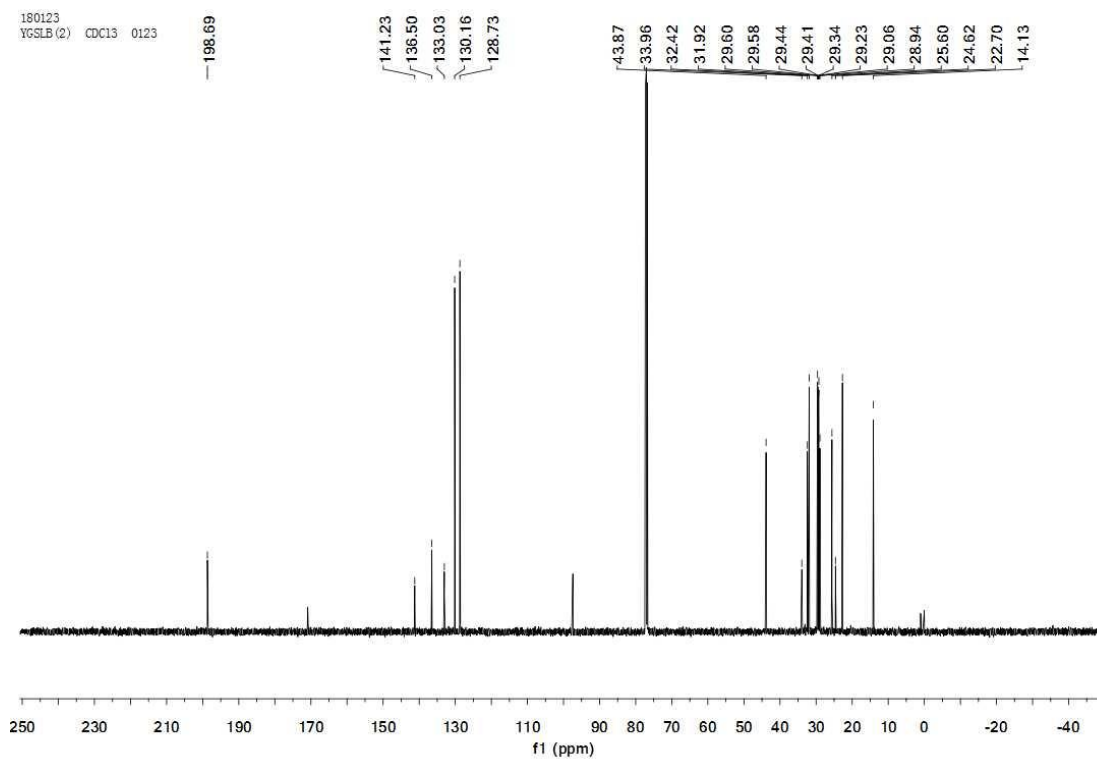

<sup>1</sup>H-NMR of compound 31

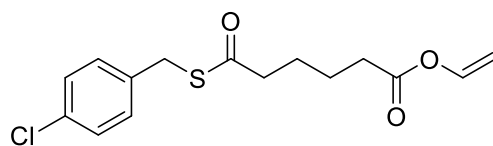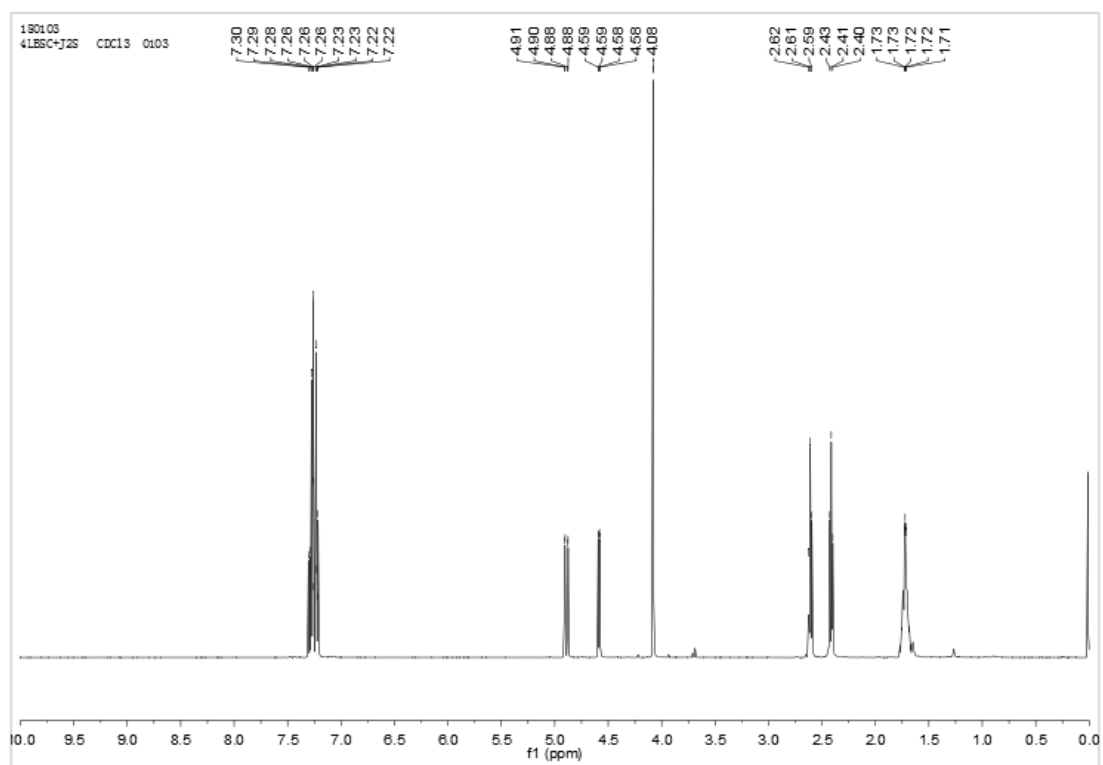

<sup>13</sup>C-NMR of compound 31

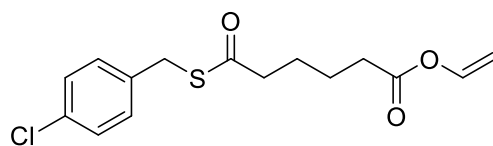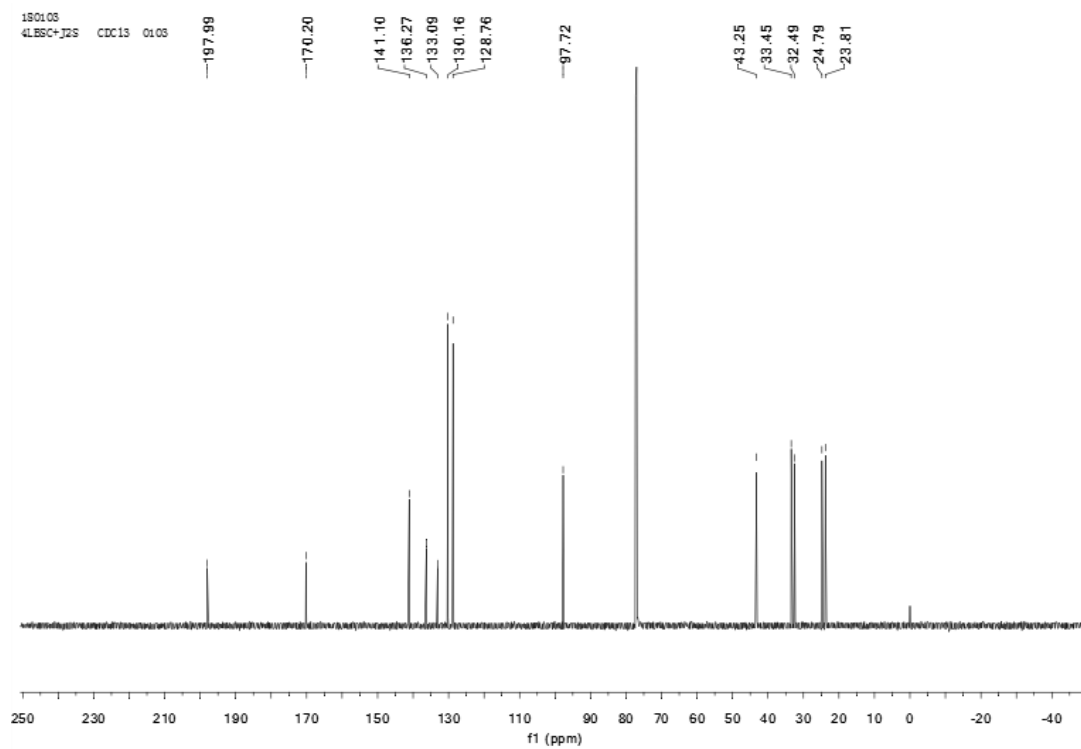

## The Mass spectrum of compound

### compound 3b

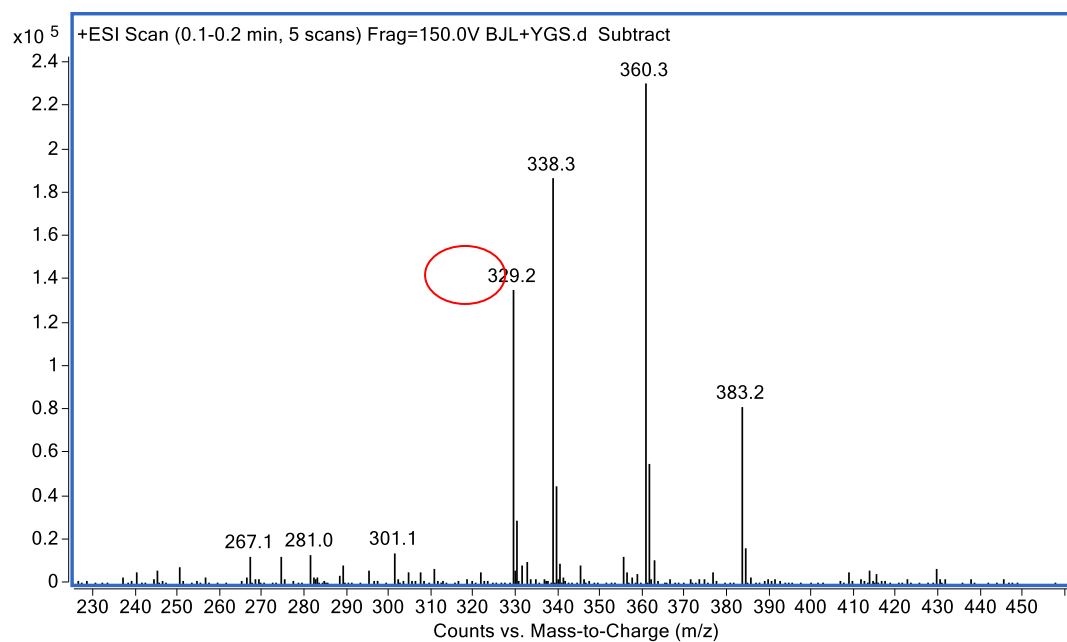

### compound 3c

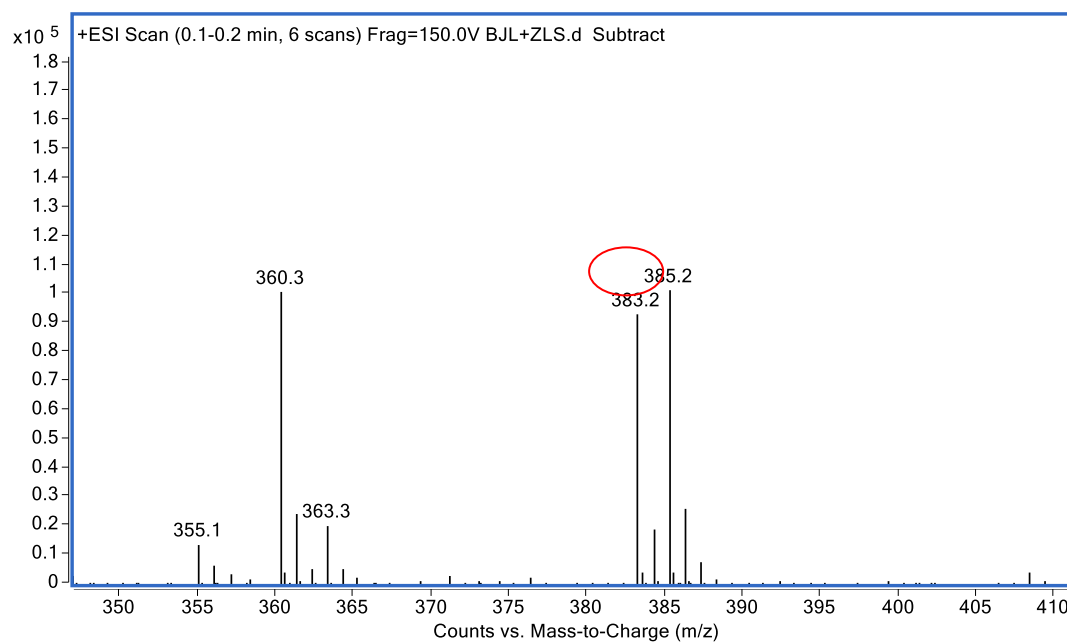

compound 3d

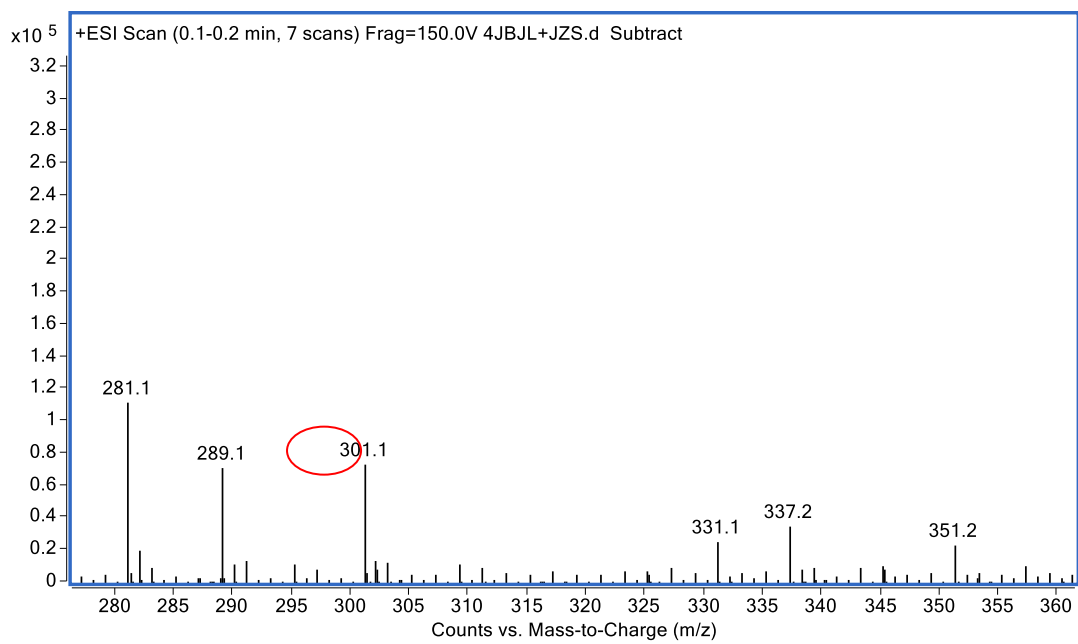

Supplement: s001 [file catalysts-08-00249-s001.pdf]
